# Supplementary material for: Current biochemical understanding regarding the metabolism of acinetobactin, the major siderophore of the human pathogen Acinetobacter baumannii, and outlook for discovery of novel anti-infectious agents based thereon
Source: Royal Society of Chemistry journal article supplement (doi:10.1039/c9np00046a), 2019-10-29
Supplement: c9np00046a1.pdf [file c9np00046a1.pdf]

## Supplementary Information

### **Current biochemical understanding regarding the metabolism of acinetobactin, the major siderophore of the human pathogen *Acinetobacter baumannii*, and outlook for discovery of novel anti-infectious agents based thereon**

Woon Young Song<sup>a</sup> and Hak Joong Kim,<sup>\*a,b</sup>

Page 2: **Supplementary Figure 1.** Structures of fimsbactins and baumannoferrins

Page 3: **Supplementary Scheme 1.** Total synthesis of acinetobactin

Page 4: **References**

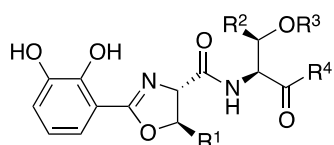

|              | R <sup>1</sup> | R <sup>2</sup> | R <sup>3</sup> | R <sup>4</sup> |
|--------------|----------------|----------------|----------------|----------------|
| fimsbactin A | H              | H              |                | I              |
| fimsbactin B | Me             | H              |                | I              |
| fimsbactin C | Me             | Me             |                | I              |
| fimsbactin D | H              | H              |                | II             |
| fimsbactin E | H              | H              |                | OH             |
| fimsbactin F | H              | H              | H              | I              |

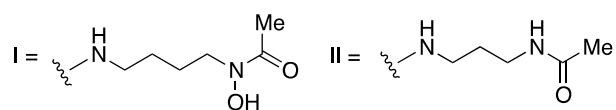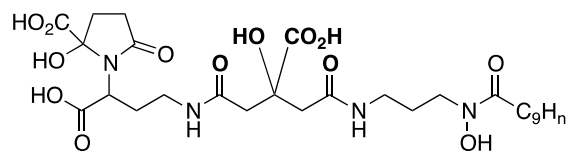

$n = 17$ : baumannoferrin A  
 $n = 19$ : baumannoferrin B

**Supplementary Figure 1.** Structures of fimsbactins and baumannoferrins, other siderophores for *Acinetobacter baumannii*.

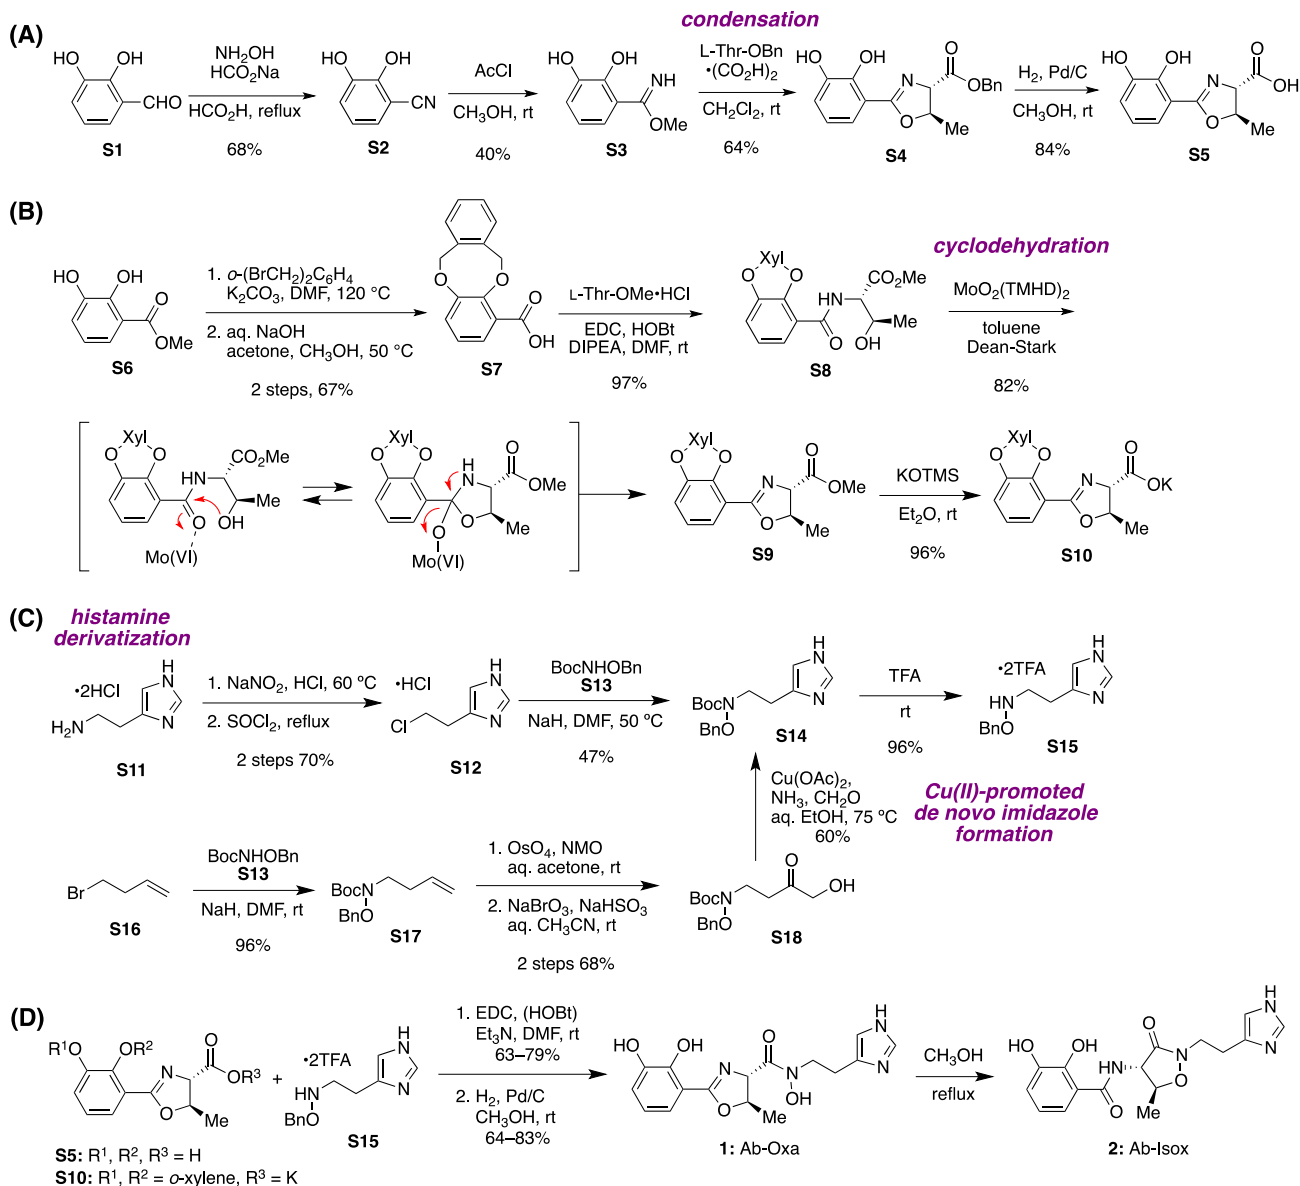

**Supplementary Scheme 1.** Total synthesis of acinetobactin. Currently, two synthetic routes have been devised by Takeuchi and Kim laboratories,<sup>S1, S2</sup> and they share a common theme in that two fragments, oxazoline acid and *N*-hydroxy histamine derivatives, are prepared first and a subsequent combination between them followed by global deprotection completes the total synthesis. (A) Preparation of oxazoline acid fragment **S5** by Takeuchi laboratory involving a condensation between imidate **S3** and L-Thr-OBn to construct the oxazoline ring of **S4**. (B) Preparation of oxazoline acid fragment **S10** by Kim laboratory, in which the oxazoline ring of **S9** was constructed by dehydrative cyclization from **S8** using a molybdenum oxide catalyst. (C) Preparation of *N*-hydroxy histamine fragment **S15**. Takeuchi laboratory accessed this fragment directly from histamine **S11** involving replacement of a primary amine group with chloride followed by a nucleophilic substitution with protected hydroxyl amine precursor **S13**. Kim and co-workers undertook a different approach involving a Cu(II)-promoted de novo imidazole formation (**S18** → **S14**) from simple alkenyl halide precursor **S16**. (D) Completion of total syntheses of Ab-Oxa (**1**) and Ab-Isox (**2**). Both research laboratories used the same methods to finish the syntheses initiated by amide formation between oxazoline acid fragment **S5** or **S10** and *N*-hydroxy histamine fragment **S15**. Global deprotection based on hydrogenolysis successfully yielded Ab-Oxa (**1**). Then, this compound could be readily converted to Ab-Isox (**2**) by simple reflux in methanol, corroborating the biosynthetic proposal by Walsh and co-worker described in the main text.

## References

- S1. Y. Takeuchi, S. Ozaki, M. Satoh, K.-i. Mimura, S.-i. Hara, H. Abe, H. Nishioka and T. Harayama, *Chem. Pharm. Bull.*, 2010, **58**, 1552-1553.
- S2. J. Kim, J. E. Lee, H. Ree and H. J. Kim, *Bull. Kor. Chem. Soc.*, 2015, **36**, 439-441.
